# Supplementary material
Source: PubMed Central journal article supplement (PMC6139821)
Supplement: mmc1.pdf [file mmc1.pdf]

**Biophysical Journal, Volume 115**

**Supplemental Information**

**Optimal Hydrophobicity and Reorientation of Amphiphilic Peptides  
Translocating through Membrane**

**Ivo Kabelka and Robert Vácha**

## SUPPLEMENTARY INFORMATION

Table S1: System compositions of coarse-grained simulations

|         | 4, 6 nm | 1, 2, 3, 8 nm |
|---------|---------|---------------|
| Peptide | 1       | 1             |
| Lipid   | 200     | 500           |

Table S2: System compositions of all-atom simulations

|         | Parallel |      |      |      | Perpendicular |      |      |      |
|---------|----------|------|------|------|---------------|------|------|------|
|         | 5        | 8    | 11   | 21   | 5             | 8    | 11   | 21   |
| Peptide | 1        | 1    | 1    | 1    | 1             | 1    | 1    | 1    |
| POPC    | 128      | 128  | 128  | 128  | 118           | 118  | 118  | 118  |
| TIP3P   | 6827     | 6817 | 6817 | 6826 | 7358          | 7373 | 7373 | 7344 |
| Na      | 37       | 37   | 37   | 37   | 37            | 37   | 37   | 37   |
| Cl      | 37       | 37   | 37   | 37   | 37            | 37   | 37   | 37   |

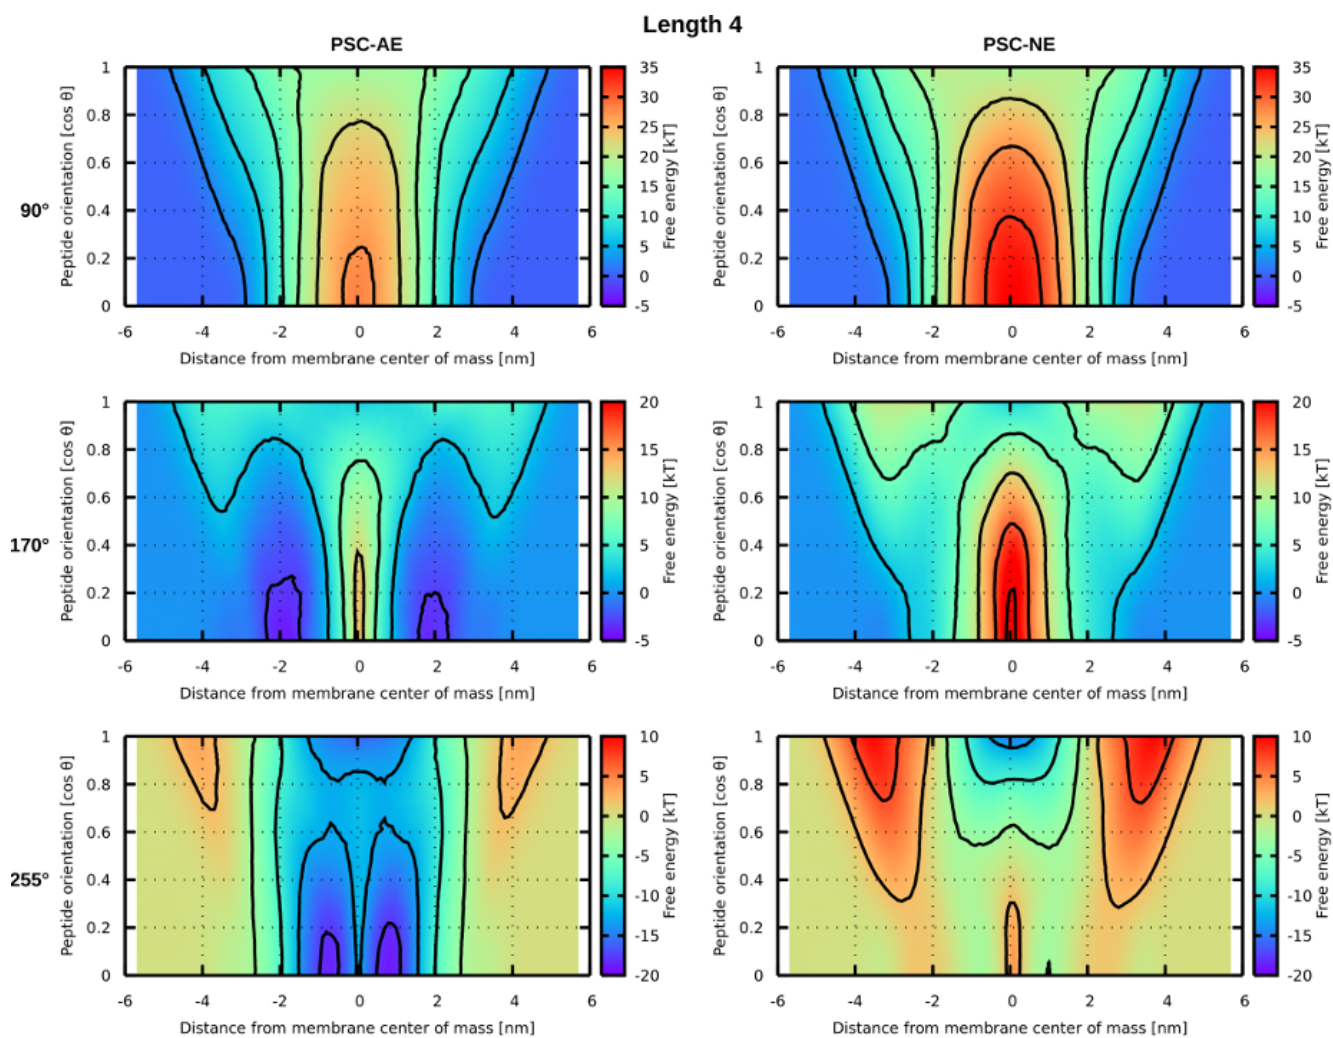

Figure S1: Calculated free energy surface of peptide translocation across lipid bilayer. Peptides of length 4 nm are shown. Peptides with attractive and non-attractive endcaps are shown in the left and right columns, respectively. Hydrophobic patch width is 90, 170, and 250°. Contours are drawn at every 10 kT.

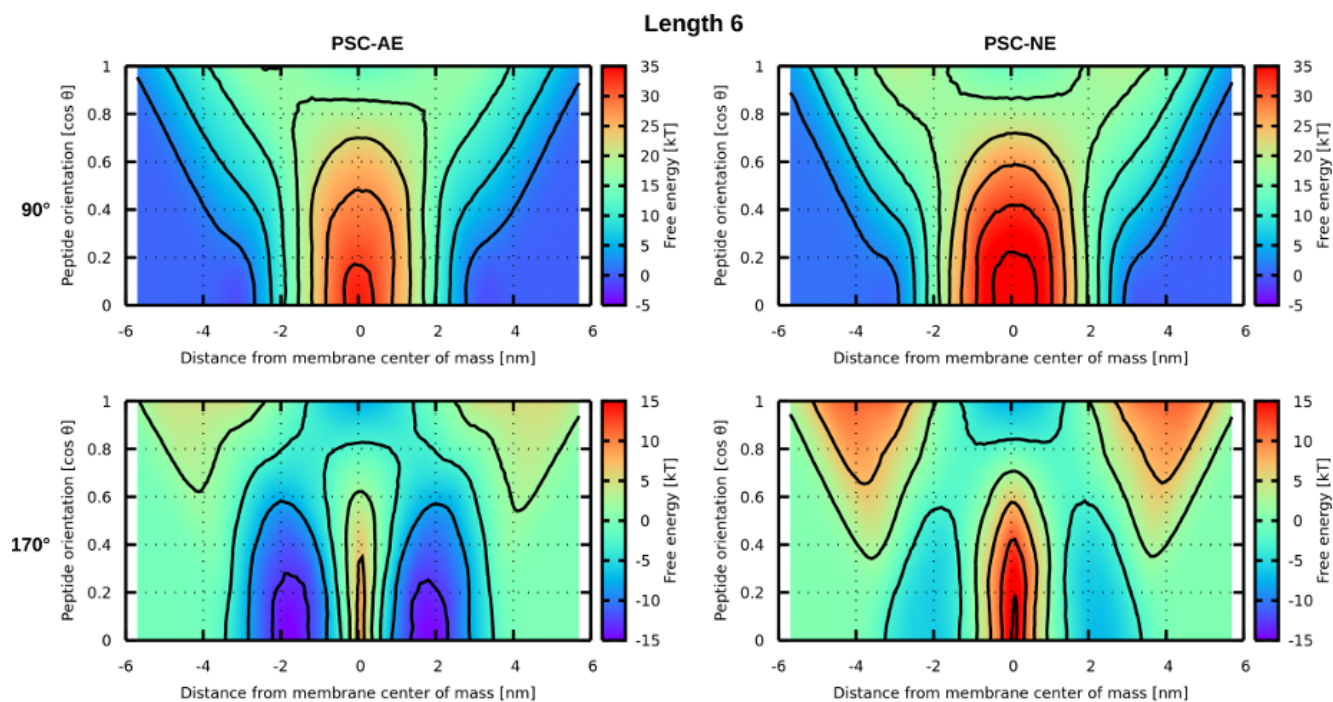

Figure S2: Calculated free energy surface of peptide translocation across lipid bilayer. Peptides of length 6 nm are shown. Peptides with attractive and non-attractive endcaps are shown in the left and right columns, respectively. Hydrophobic patch width is 90 and 170°. Contours are drawn at every 10 kT.

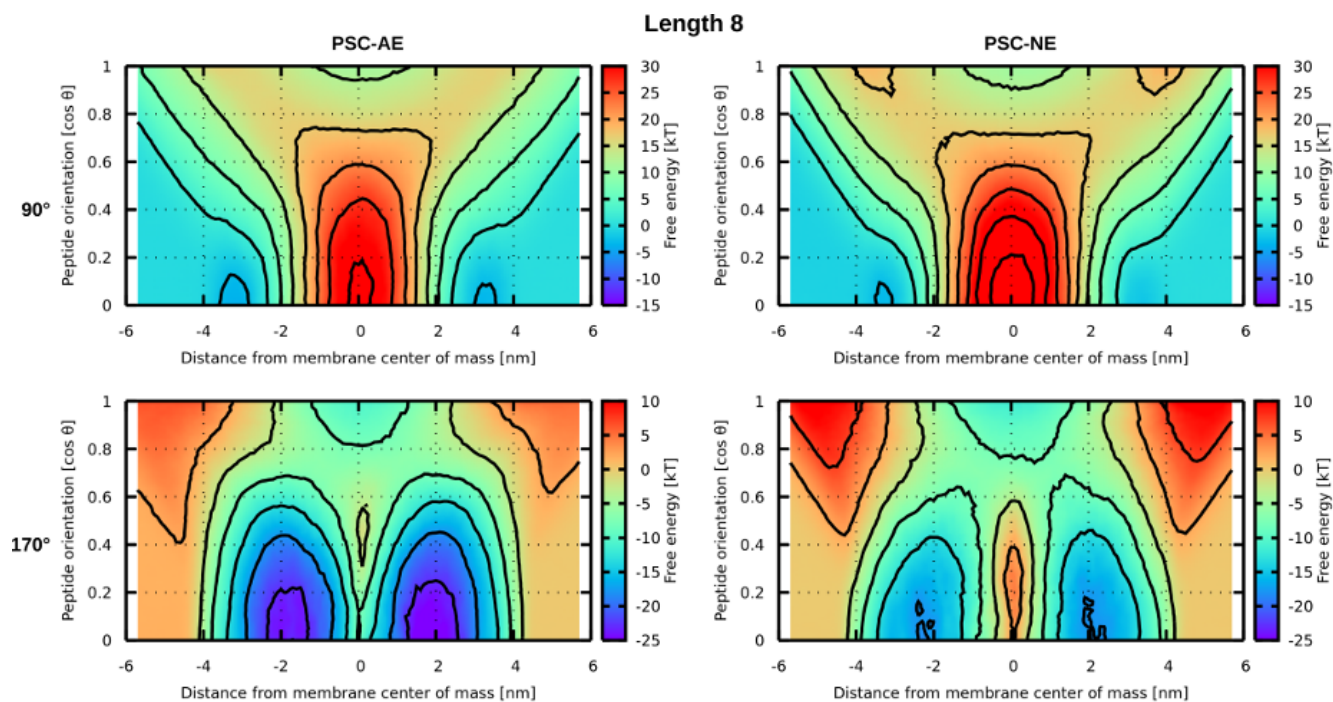

Figure S3: Calculated free energy surface of peptide translocation across lipid bilayer. Peptides of length 8 nm are shown. Peptides with attractive and non-attractive endcaps are shown in the left and right columns, respectively. Hydrophobic patch width is 90 and 170°. Contours are drawn at every 10 kT.

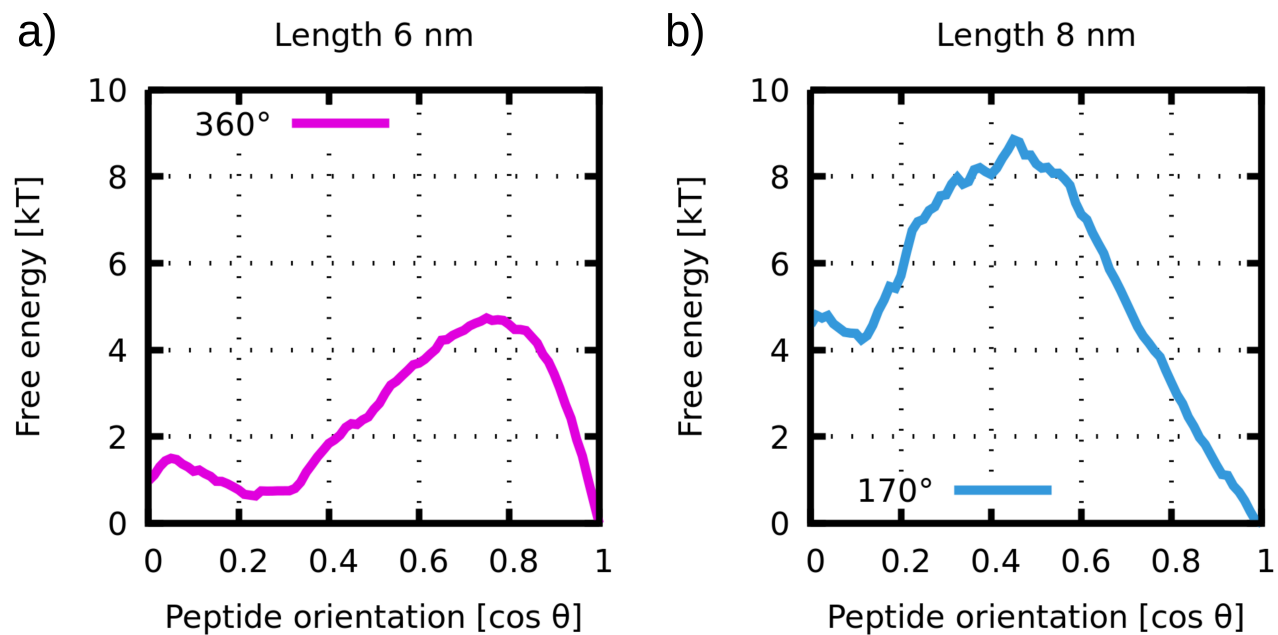

Figure S4: Free energy profile for the change of peptide orientation. The peptides are located in the membrane center. [IVO co je to PSC CPSC...? trochu se u toho popisu rozepis]

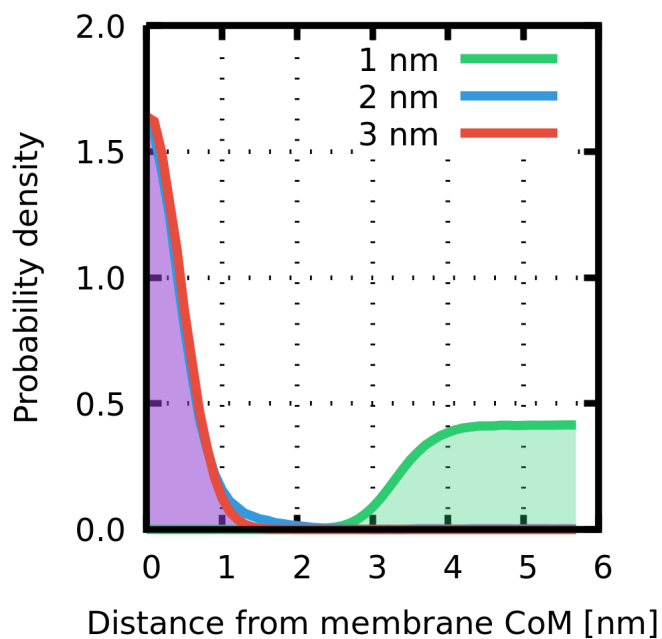

Figure S5: Distribution of short hydrophobic peptides (modeled by PSC particles) as a function of distance from membrane center of mass.

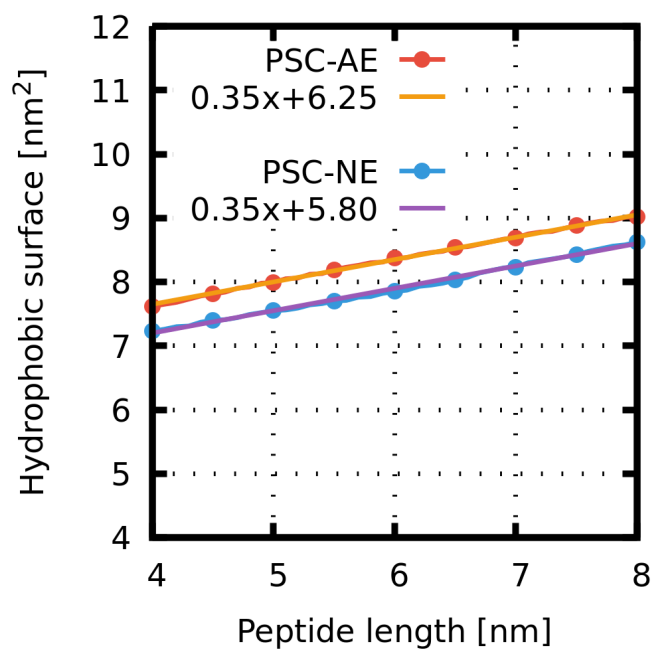

Figure S6: Optimal hydrophobic surface area for given peptide length. Lines with circles are calculated data points and smooth lines are linear fits.
